# Supplementary material for: Ag3V2(PO4)2F3, a new compound obtained by Ag+/Na+ ion exchange into the Na3V2(PO4)2F3 framework
Source: Royal Society of Chemistry journal article supplement (doi:10.1039/c8ta01095a), 2018-01-01

## **$\text{Ag}_3\text{V}_2(\text{PO}_4)_2\text{F}_3$ , a new compound obtained by $\text{Ag}^+/\text{Na}^+$ ion exchange into the $\text{Na}_3\text{V}_2(\text{PO}_4)_2\text{F}_3$ framework**

M. Bianchini <sup>a,b,c,e</sup>, F. Lalère <sup>a,e</sup>, H. B. L. Nguyen <sup>a,b,e</sup>, F. Fauth <sup>d</sup>, R. David <sup>a,e</sup>, E. Suard <sup>c</sup>, L. Croguennec <sup>b,e,f</sup> and C. Masquelier <sup>a,e,f</sup>

### **Supplementary Information**

Figure S1: SEM image of  $\text{Na}_3\text{V}_2(\text{PO}_4)_2\text{F}_3$  obtained as a microcrystalline powder (particles size  $\approx 1\ \mu\text{m}$ ) without any carbon coating at the surface of the particles.

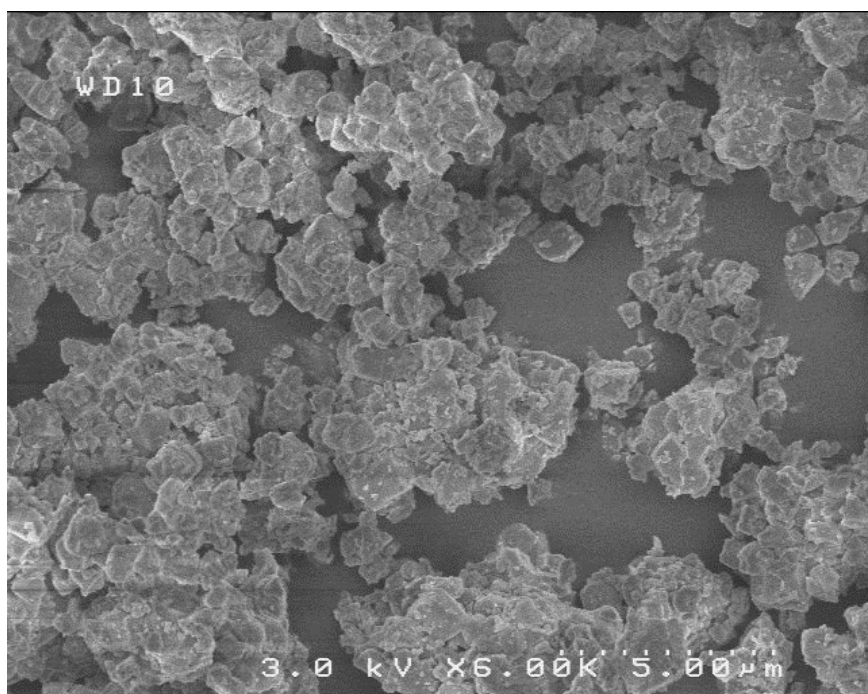

Figure S2: SEM image of  $\text{Na}_3\text{V}_2(\text{PO}_4)_2\text{F}_3\text{-c}$ , made using intermediate  $\text{VPO}_4\text{-c}$ , resulting in particles size of the order of hundreds of nm and with a carbon coating.

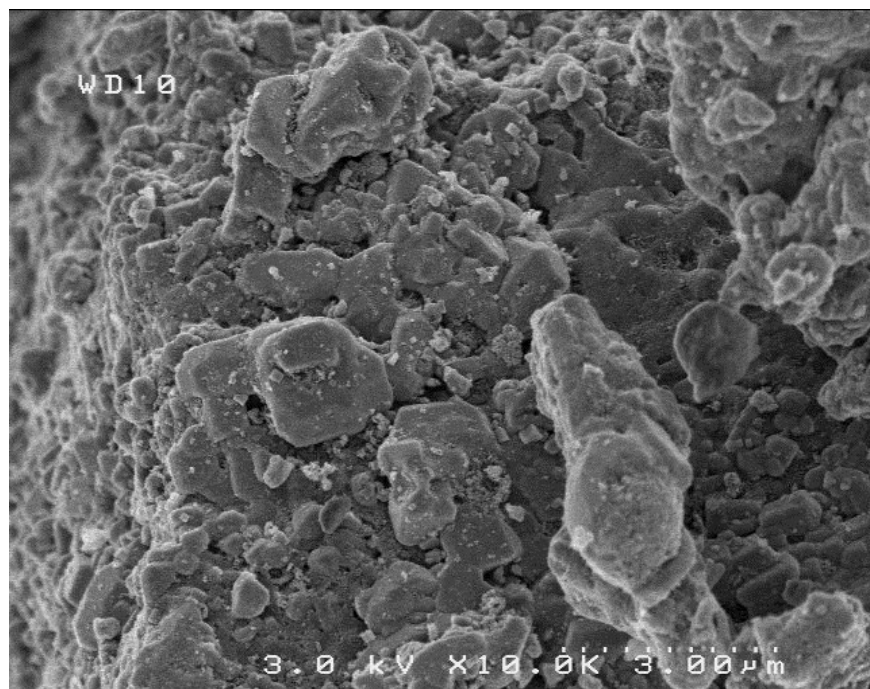

Figure S3: Rietveld refinement of synchrotron XRPD of  $\text{Ag}_3\text{VPF}$ , with arrows highlighting the unindexed reflections. Measured data are shown as green dots, Rietveld fit as a black line.

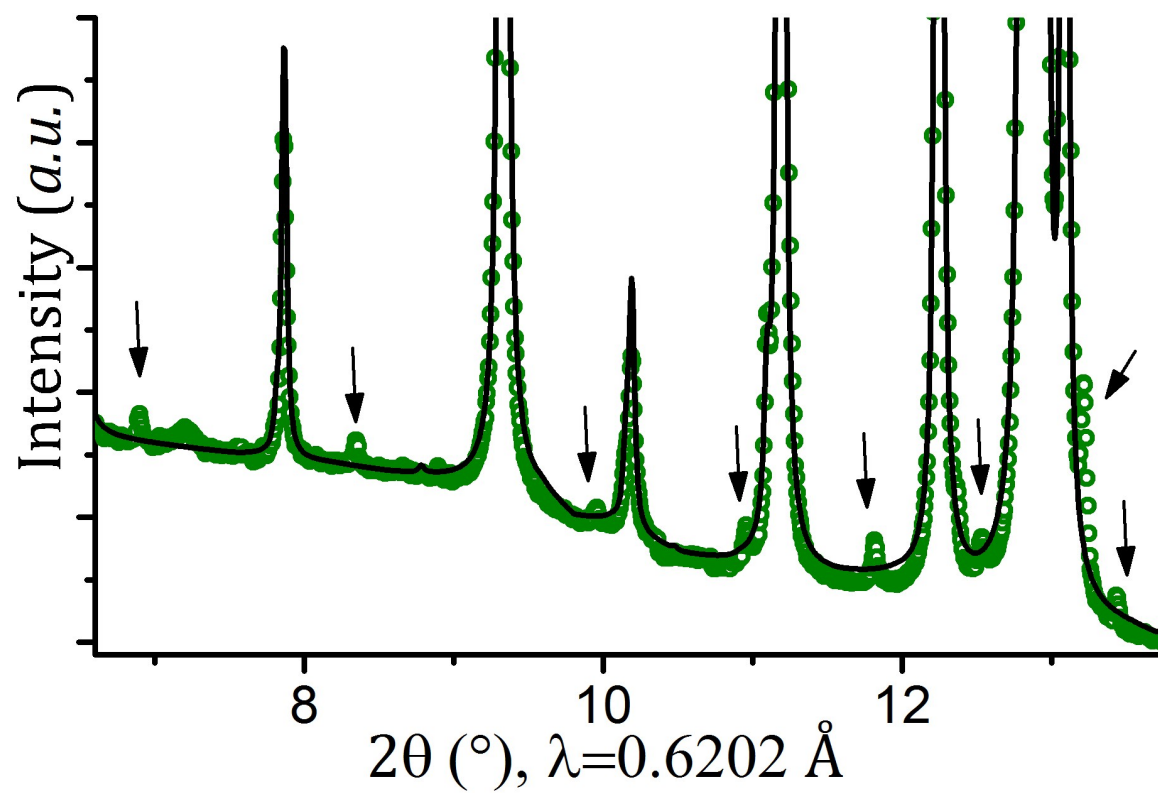

Supplement: c8ta01095a1.pdf [file c8ta01095a1.pdf]
